# Supplementary material
Source: MDPI journal article supplement (https://www.mdpi.com/1996-1073/16/15/5824)

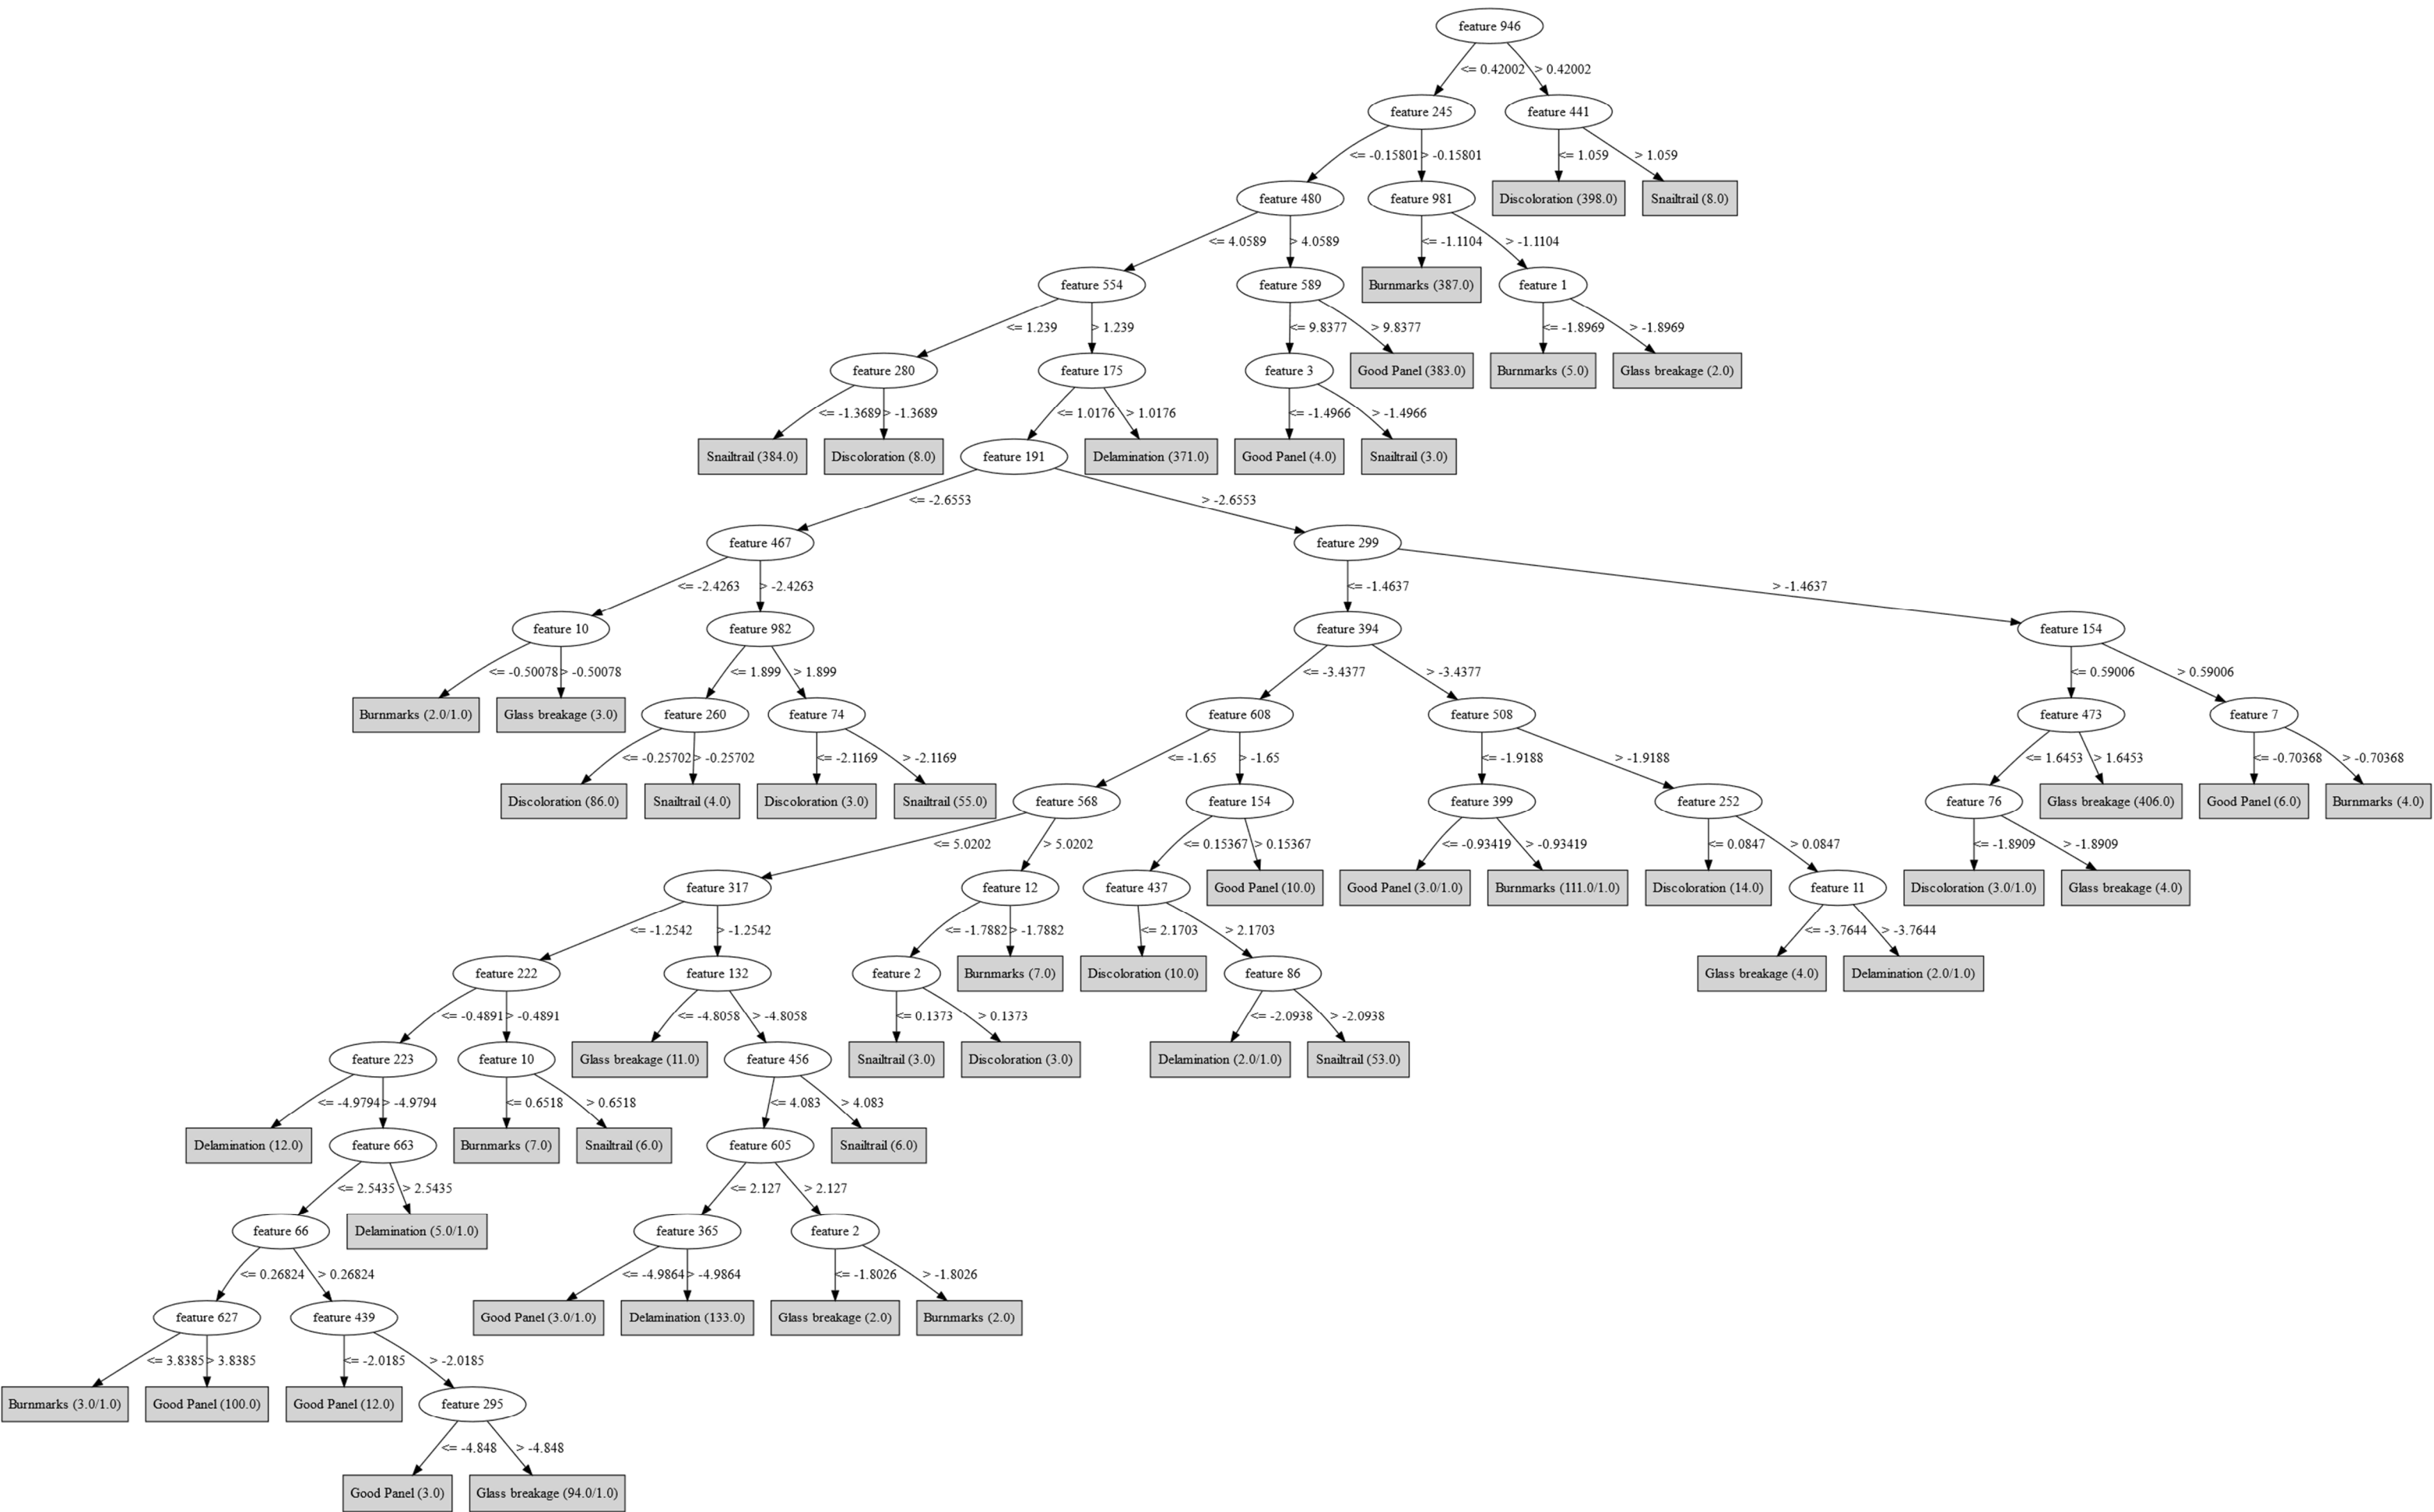

File S1. J48 representation of DenseNet 201 features selected.

Supplement: s1 [file s1 › energies-2540436-supplementary.pdf]
